# Supplementary material
Source: Springer Nature journal article supplement (https://www.springermedizin.de/resource/supplementary/13018_2010_269_MOESM4_ESM.pdf/9636674)

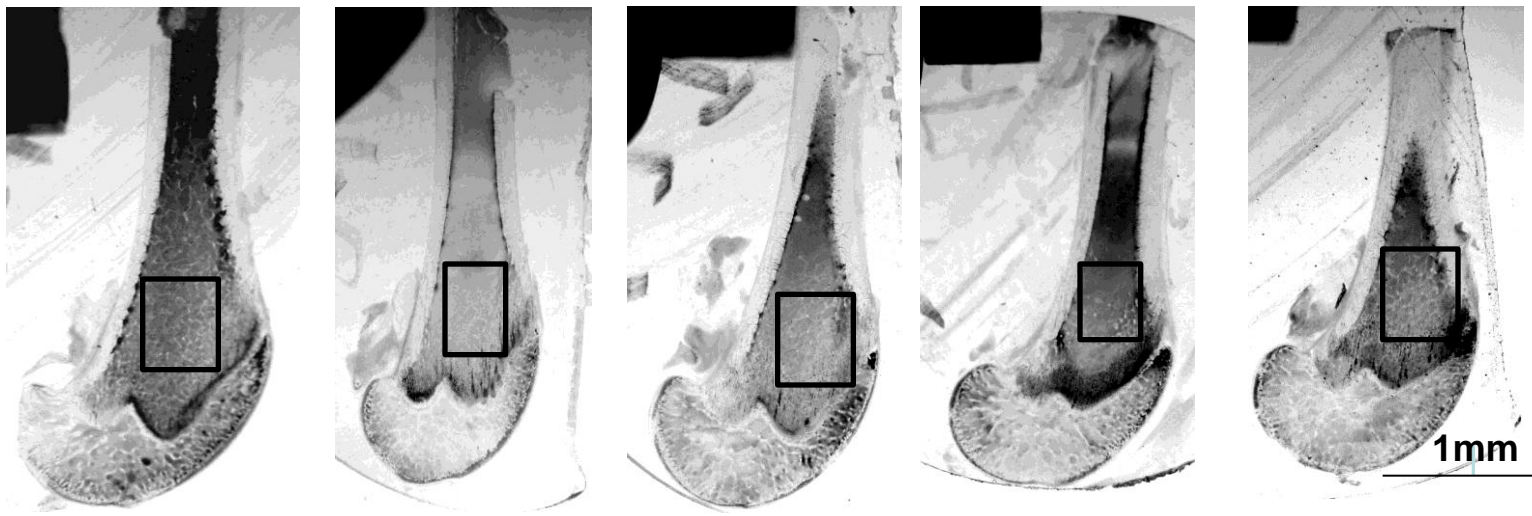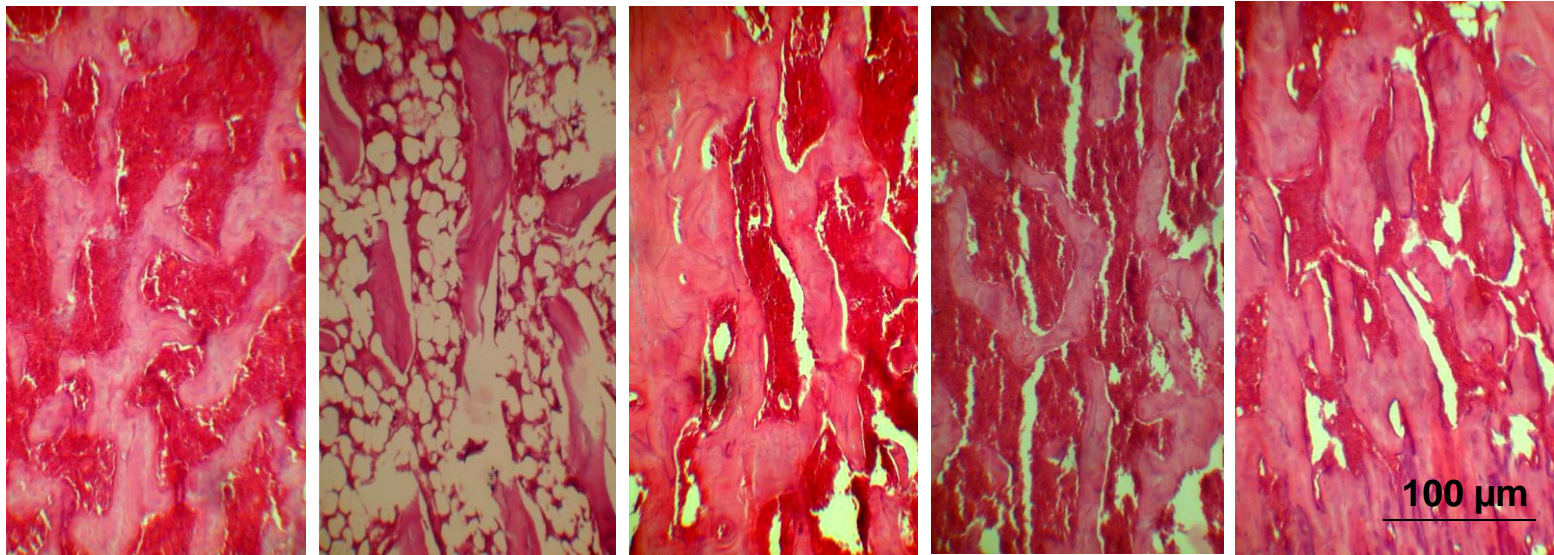

**A: SHAM**

**B: OVX**

**C: ALN**

**D: OPG-Fc**

**E: OPG-Fc+ALN**

Supplement: MOESM4 [file 9636674]
